# Supplementary material for: Offshore Evidence for an Undocumented Tsunami Event in the ‘Low Risk’ Gulf of Aqaba-Eilat, Northern Red Sea
Source: PLoS One. 2016 Jan 27;11(1):e0145802. doi: 10.1371/journal.pone.0145802 (PMC4729680; doi:10.1371/journal.pone.0145802)
Supplement: S1 File — (XLS) [file pone.0145802.s001.xls]

## Sheet: Table A
CENTER FOR ACCELERATOR MASS SPECTROMETRY
Lawrence Livermore National Laboratory
14C results
CAMS #	Sample	Sample Material	Mid Sample Depth	Decompacted Depth*	d13C	fraction	±	D14C	±	14C age (%)	±	14C age (year)
	Name			ABOVE 200cm core depth-->core5=1.55, core 4=1.325		Modern
158540	E4086089	Foraminifera tests and shell	87.5	115.938	0	0.869086	0.00288546	-130.914	2.88546	1125		32.4614
158541	E4375381	Foraminifera tests and shell	377.5	442.5
158542	E4212216	Foraminifera tests and shell	214	279	0	0.726978	0.00266451	-273.022	2.66451	2560		68.2114
158543	E4313315	Foraminifera tests and shell	314	379	0	0.6541	0.00239077	-345.9	2.39077	3410		81.5251
158544	E4365368	Foraminifera tests and shell	366.5	431.5	0	0.649598	0.0023776	-350.402	2.3776	3465		82.3837
158545	E5110113	Foraminifera tests and shell	111.5	172.825	0	0.61459	0.00227897	-385.41	2.27897	3910		89.1076
158546	E5090091	Foraminifera tests and shell	90.5	140.275	0	0.721674	0.00245629	-278.326	2.45629	2620		64.3547
158547	E5260262	Foraminifera tests and shell	261	371	0	0.548916	0.00210827	-451.084	2.10827	4820		101.618
158548	E5210211	Foraminifera tests and shell	210.5	320.5	0	0.587017	0.00220537	-412.983	2.20537	4280		94.39
158549	E5150151	Foraminifera tests and shell	150.5	233.275	0	0.626628	0.00231264	-373.372	2.31264	3755		86.8398
158550	E5050051	Foraminifera tests and shell	50.5	78.275	0	0.85014	0.00295137	-149.86	2.95137	1305		38.5154
1) d13C values are the assumed values according to Stuiver and Polach (Radiocarbon, v. 19, p.355, 1977) when given
without decimal places. Values measured for the material itself are given with a single decimal place.
2) The quoted age is in radiocarbon years using the Libby half life of 5568 years and following the conventions of Stuiver and Polach (ibid.).
3) Radiocarbon concentration is given as fraction Modern, D14C, and conventional radiocarbon age.
4) Sample preparation backgrounds have been subtracted, based on measurements of samples of 14C-free calcite
Backgrounds were scaled relative to sample size.
* Decompaction based on measurements in field and collection. If compaction in field equaled that after core opening, no loss was presumed. All compaction is presumed to occur in the upper 2 m of the core. Equal decompaction is calculated based on foll

## Sheet: Table B
Sample Number	midpoint	calibrated low	calibrated high	average	error		Delta R = 400±0	Date in Text (2sig*)	BC/AD	±
e07c4086	87.5	888	973	930.5	42.5		530.5	530	AD	45
e07c4212	214	-805	-739	-772	33	0.55	-372	251	BC	150
e07c4212	214	-690	-663	-676.5	13.5	0.15	-276.5
e07c4212	214	-648	-548	-598	50	0.29	-198
e07c4313	314	-1877	-1840	-1858.5	18.5	0.07	-1458.5
e07c4313	314	-1826	-1795	-1810.5	15.5	0.04	-1410.5
e07c4313	314	-1783	-1612	-1697.5	85.5	0.89	-1297.5	1297	BC	85
e07c4365	366	-1896	-1683	-1789.5	106.5		-1389.5	1390	BC	110
*89% and not 94% reported for sample 365
North Beach Core Radiocarbon Calibrations
RADIOCARBON CALIBRATION PROGRAM*
CALIB REV6.0.0
Copyright 1986-2010 M Stuiver and PJ Reimer
*To be used in conjunction with:
Stuiver, M., and Reimer, P.J., 1993, Radiocarbon, 35, 215-230.
Annotated results (text) - -
Export file - c14res.csv
e08c408608
Lab Code
Sample Description (80 chars max)
Radiocarbon Age BP 1125 +/- 16
Calibration data set: intcal09.14c # Reimer et al. 2009
% area enclosed cal AD age ranges relative area under
probability distribution
68.3 (1 sigma) cal AD 894- 899 0.120
918- 965 0.880
95.4 (2 sigma) cal AD 888- 973 1.000
e08c437538
Lab Code
Sample Description (80 chars max)
Radiocarbon Age BP 850 +/- 13
Calibration data set: intcal09.14c # Reimer et al. 2009
% area enclosed cal AD age ranges relative area under
probability distribution
68.3 (1 sigma) cal AD 1183- 1216 1.000
95.4 (2 sigma) cal AD 1164- 1220 1.000
e07c421221
Lab Code
Sample Description (80 chars max)
Radiocarbon Age BP 2560 +/- 35
Calibration data set: intcal09.14c # Reimer et al. 2009
% area enclosed cal AD age ranges relative area under
probability distribution
68.3 (1 sigma) cal BC 800- 753 0.717
685- 668 0.192
611- 597 0.091
95.4 (2 sigma) cal BC 805- 739 0.550
690- 663 0.157
648- 548 0.292
e07c431331
Lab Code
Sample Description (80 chars max)
Radiocarbon Age BP 3410 +/- 41
Calibration data set: intcal09.14c # Reimer et al. 2009
% area enclosed cal AD age ranges relative area under
probability distribution
68.3 (1 sigma) cal BC 1753- 1661 0.902
1653- 1638 0.098
95.4 (2 sigma) cal BC 1877- 1840 0.073
1826- 1795 0.041
1783- 1612 0.886
e07c436536
Lab Code
Sample Description (80 chars max)
Radiocarbon Age BP 3465 +/- 42
Calibration data set: intcal09.14c # Reimer et al. 2009
% area enclosed cal AD age ranges relative area under
probability distribution
68.3 (1 sigma) cal BC 1878- 1840 0.316
1827- 1793 0.251
1784- 1739 0.394
1705- 1699 0.039
95.4 (2 sigma) cal BC 1896- 1683 1.000

## Sheet: Table C
Sample Number	midpoint	Decompacted Value	calibrated low	calibrated high	average
		ABOVE 200cm core depth-->core5=1.55, core 4=1.325
						error
Tur Yam Radiocarbon Calibrations
Sample	Mean Core depth	Decompacted Depth*	2sigRange1-low	2sigRange1-high	2sigRange1avg	±	Relative area	Delta R = 400±0	Date in Text (2sig)	BC/AD	±
Name
E5050051	50.5	78.275	658	730	694	36	0.67	294	324	AD	65
E5050051	50.5	78.275	735	772	753.5	18.5	0.321	353.5
E5090091	90.5	140.275	-920	-725	-822.5	97.5	0.758	-422.5	-330	BC	230
E5090091	90.5	140.275	-694	-541	-617.5	76.5	0.24	-217.5
E5110113	111.5	172.825	-2831	-2821	-2826	5	0.003	-2426
E5110113	111.5	172.825	-2631	-2134	-2382.5	248.5	0.992	-1982.5	-1983	BC	250
E5110113	111.5	172.825	-2076	-2064	-2070	6	0.003	-1670
E5150151	150.5	233.275	-2459	-2416	-2437.5	21.5	0.041	-2037.5
E5150151	150.5	233.275	-2411	-1954	-2182.5	228.5	0.958	-1782.5	-1783	BC	230
E5210211	210.5	320.5	-3319	-3273	-3296	23	0.019	-2896
E5210211	210.5	320.5	-3266	-3236	-3251	15	0.017	-2851
E5210211	210.5	320.5	-3170	-3163	-3166.5	3.5	0.003	-2766.5
E5210211	210.5	320.5	-3113	-2580	-2846.5	266.5	0.96	-2446.5	-2447	BC	270
E5260262	261	371	-3895	-3881	-3888	7	0.006	-3488
E5260262	261	371	-3800	-3364	-3582	218	0.993	-3182	-3182	BC	220
RADIOCARBON CALIBRATION PROGRAM*
CALIB REV6.0.0
Copyright 1986-2010 M Stuiver and PJ Reimer
*To be used in conjunction with:
Stuiver, M., and Reimer, P.J., 1993, Radiocarbon, 35, 215-230.
Annotated results (text) - -
Export file - c14res.csv
E5112
Coral
Radiocarbon Age 3910±89
Calibration data set: intcal09.14c
# Reimer et al. 2009
One Sigma Ranges: [start:end] relative area
[cal BC 2559: cal BC 2553] 0.019512
[cal BC 2551: cal BC 2536] 0.041235
[cal BC 2491: cal BC 2282] 0.878103
[cal BC 2249: cal BC 2232] 0.049913
[cal BC 2217: cal BC 2214] 0.011237
Two Sigma Ranges: [start:end] relative area
[cal BC 2831: cal BC 2821] 0.003941
[cal BC 2631: cal BC 2134] 0.992279
[cal BC 2076: cal BC 2064] 0.00378
E5090
foraminifera
Radiocarbon Age 2620±64
Calibration data set: intcal09.14c
# Reimer et al. 2009
One Sigma Ranges: [start:end] relative area
[cal BC 895: cal BC 868] 0.103391
[cal BC 857: cal BC 852] 0.016124
[cal BC 851: cal BC 756] 0.814884
[cal BC 684: cal BC 669] 0.0656
Two Sigma Ranges: [start:end] relative area
[cal BC 920: cal BC 725] 0.75857
[cal BC 694: cal BC 541] 0.24143
E5261
foraminifera
Radiocarbon Age 4820±102
Calibration data set: intcal09.14c
# Reimer et al. 2009
One Sigma Ranges: [start:end] relative area
[cal BC 3705: cal BC 3515] 0.894891
[cal BC 3423: cal BC 3404] 0.055257
[cal BC 3399: cal BC 3384] 0.049852
Two Sigma Ranges: [start:end] relative area
[cal BC 3895: cal BC 3881] 0.006904
[cal BC 3800: cal BC 3364] 0.993096
E5210
foraminifera
Radiocarbon Age 4280±94
Calibration data set: intcal09.14c
# Reimer et al. 2009
One Sigma Ranges: [start:end] relative area
[cal BC 3083: cal BC 3066] 0.037759
[cal BC 3027: cal BC 2854] 0.68186
[cal BC 2812: cal BC 2746] 0.203516
[cal BC 2725: cal BC 2697] 0.076866
Two Sigma Ranges: [start:end] relative area
[cal BC 3319: cal BC 3273] 0.019617
[cal BC 3266: cal BC 3236] 0.017242
[cal BC 3170: cal BC 3163] 0.00311
[cal BC 3113: cal BC 2580] 0.96003
E5150
Coral
Radiocarbon Age 3755±87
Calibration data set: intcal09.14c
# Reimer et al. 2009
One Sigma Ranges: [start:end] relative area
[cal BC 2293: cal BC 2032] 1.
Two Sigma Ranges: [start:end] relative area
[cal BC 2459: cal BC 2416] 0.041752
[cal BC 2411: cal BC 1954] 0.958248
E5050
foraminifera
Radiocarbon Age 1305±31
Calibration data set: intcal09.14c
# Reimer et al. 2009
One Sigma Ranges: [start:end] relative area
[cal AD 665: cal AD 709] 0.698072
[cal AD 747: cal AD 766] 0.301928
Two Sigma Ranges: [start:end] relative area
[cal AD 658: cal AD 730] 0.678727
[cal AD 735: cal AD 772] 0.321273
Ranges marked with a * are suspect due to impingment on the end of the calibration data set
# PJ Reimer, MGL Baillie, E Bard, A Bayliss, JW Beck, PG Blackwell,
# C Bronk Ramsey, CE Buck, GS Burr, RL Edwards, M Friedrich, PM Grootes,
# TP Guilderson, I Hajdas, TJ Heaton, AG Hogg, KA Hughen, KF Kaiser, B Kromer,
# FG McCormac, SW Manning, RW Reimer, DA Richards, JR Southon, S Talamo,
# CSM Turney, J van der Plicht, CE Weyhenmeyer (2009) Radiocarbon 51:1111-1150.

## Sheet: Table D
North Beach Core Foraminifera Calculations
Core	Sample#	mid-value (cm)	Proportion of sample picked	# of forams/aliquot >500micron	# corroded/black/yellow eper >500 aliquot	normalized #/aliquot	500micron total number normalized #/1cm3	500 micron % CBY/aliquot	125-500 # per aliquot	>125 #/1cc	Proportion of >500micron	abundance all/1cm3
EC4	10011	10.5	1	376	5	376	300.8	0.0132979	902.4	853	0.352638	1153.8
EC4	40041	41.5	1	287	1	287	229.6	0.00348432	688.8	613	0.374551	842.6
EC4	60061	60.5	1	314	2	314	251.2	0.00636943	753.6	702	0.357835	953.2
EC4	80081	80.5	1	293	9	293	234.4	0.0307167	703.2	642	0.365109	876.4
EC4	100101	100.5	1	285	35	285	228	0.122807	684	632	0.360759	860
EC4	150151	150.5	1	260	12	260	208	0.0461538	624	747	0.278447	955
EC4	160161	160.5	1	38	5	38	30.4	0.131579	91.2	84	0.361905	114.4
EC4	170171	170.5	1	40	8	40	32	0.2	96	38	0.842105	70
EC4	180181	180.5	1	60	17	60	48	0.283333	144	64	0.75	112
EC4	190191	190.5	1	15	5	15	20	0.333333	6	20	1	40
EC4	200201	200.5	1	26	8	26	20.8	0.307692	62.4	25	0.832	45.8
EC4	250251	250.5	1	230	15	230	184	0.0652174	552	556	0.330935	740
EC4	300301	300.5	1	293	2	293	234.4	0.00682594	703.2	678	0.345723	912.4

## Sheet: Table E
Tur Yam Core Foraminifera Calculations
Core	Sample#	mid-value	Proportion of sample picked	# of forams in aliquot	# corroded/black/yellow	>500 micron normalized #/aliquot	500micron normalized #/1cm3	% C/B/Y for >500 mn	>125 #/aliquot	>125-<500 per cm3	Proportion of >500micron	Total forams/cm3
EC5	1	1	1	526	4	526	420.8	0.00760456	1386	1108.8	0.379509	1529.6
EC5	10011	10.5	0.4375	418	10	955.429	764.343	0.0239234	1046	836.8	0.399618	1601.14
EC5	20021	20.5	0.625	322	12	515.2	412.16	0.0372671	953	762.4	0.33788	1174.56
EC5	30031	30.5	0.375	281	17	749.333	599.467	0.0604982	874	699.2	0.32151	1298.67
EC5	40041	40.5	0.375	315	18	840	672	0.0571429	1150	920	0.273913	1592
EC5	50051	50.5	0.375	345	22	920	736	0.0637681	1080	864	0.319444	1600
EC5	60061	60.5	0.25	326	18	1304	1043.2	0.0552147	935	748	0.348663	1791.2
EC5	70071	70.5	0.375	347	12	925.333	740.267	0.0345821	967	773.6	0.358842	1513.87
EC5	80081	80.5	0.375	346	30	922.667	738.133	0.0867052	1154	923.2	0.299827	1661.33
EC5	90091	90.5	0.375	310	15	826.667	661.333	0.0483871	760	608	0.407895	1269.33
EC5	99104	101	0.5	331	73	662	529.6	0.220544	219	175.2	1.51142	704.8
EC5	110113	111	0.75	351	59	468	374.4	0.168091	553	442.4	0.63472	816.8
EC5	118122	120	0.75	344	73	458.667	366.933	0.212209	259	207.2	1.32819	574.133
EC5	128131	129.5	0.625	335	78	536	428.8	0.232836	327	261.6	1.02446	690.4
EC5	140141	140.5	0.625	324	90	518.4	414.72	0.277778	506	404.8	0.640316	819.52
EC5	150151	150.5	0.625	336	65	537.6	430.08	0.193452	250	200	1.344	630.08
EC5	160162	161	1	311	46	311	248.8	0.14791	400	320	0.7775	568.8
EC5	170171	170.5	0.75	303	36	404	323.2	0.118812	804	643.2	0.376866	966.4
EC5	180181	180.5	1	324	90	324	259.2	0.277778	983	786.4	0.329603	1045.6
EC5	190191	190.5	0.625	351	37	561.6	449.28	0.105413	1200	960	0.2925	1409.28
EC5	200201	200.5	0.625	334	19	534.4	427.52	0.0568862	930	744	0.35914	1171.52
EC5	210211	210.5	0.75	325	24	433.333	346.667	0.0738462	877	701.6	0.370582	1048.27
EC5	220221	220.5	0.875	322	18	368	294.4	0.0559006	1108	886.4	0.290614	1180.8
EC5	230231	230.5	1	281	17	281	224.8	0.0604982	978	782.4	0.287321	1007.2
EC5	240241	240.5	0.875	291	19	332.571	266.057	0.0652921	850	680	0.342353	946.057
EC5	250251	250.5	1	232	29	232	185.6	0.125	780	624	0.297436	809.6
EC5	260261	260.5	1	233	19	233	186.4	0.0815451	650	520	0.358462	706.4
